# Supplementary material
Source: publisher site journal article supplement (https://www.dovepress.com/article/287351)
Supplement: Supplementary file 1 [file get_supplementary_file.php]

| **Table S1. The differences of temperament between patients with bipolar subtype disorders and patients with major depressive disorders and healthy controls** | | | | | | | |
| --- | --- | --- | --- | --- | --- | --- | --- |
| **Variable** | **BD-I** | **BD-II** | **PBD-I vs HCa** | **PBD-II vs HCa** | **PBD-I vsBD-IIa** | **PBD-I vs MDDa** | **PBD-II vs MDDa** |
| TEMPS-A total score | 23.15 (5.05) | 19.31 (6.32) | <0.001b,c | <0.001b,c | 0.011b | <0.001b,c | <0.001b,c |
| TEMPS-A Cyclothymic | 9.81 (2.02) | 8.37 (2.81) | <0.001b,c | <0.001b,c | 0.018 b | <0.001b,c | <0.001b,c |
| TEMPS-A Depressive | 5.08 (1.55) | 4.48 (2.32) | <0.001b,c | <0.001b,c | 0.263 | 0.039 b | 0.290 |
| TEMPS-A Irritable | 2.96 (2.14) | 2.17 (1.69) | <0.001b,c | <0.001b,c | 0.125 | 0.002b,c | 0.019 b |
| TEMPS-A Hyperthymic | 3.73 (2.29) | 3.17 (2.32) | 0.002 b,c | 0.020 b | 0.300 | 0.001b,c | 0.003b,c |
| TEMPS-A Anxious | 1.58 (1.27) | 1.12 (1.11) | 0.001 b,c | 0.029 b | 0.121 | 0.140 | 0.664 |
| Notes: Variables are shown as mean (standard deviation); P values were assessed using Kruskal-Wallis test or Mann-Whitney test. BD = bipolar disorder; MDD = major depressive disorder; HC = healthy control; TEMPS-A = the Chinese short version of Temperament Evaluation of Memphis, Pisa and San Diego – Auto questionnaire; a uncorrected P values; b uncorrected P<0.05; c differences between groups survived Bonferroni correction (P < 0.01). | | | | | | | |

| **Table S2. The differences of temperament between never medicated patients with bipolar disorders and major depressive disorders and healthy controls** | | | | | |
| --- | --- | --- | --- | --- | --- |
| **Variable** | **Never medicated BD** | **Never medicated MDD** | **PBD vs HCa** | **PMDD vs HCa** | **PBD vs MDDa** |
| TEMPS-A total score | 21.02 (5.71) | 15.77 (6.3) | <0.001b,c | <0.001b,c | <0.001b,c |
| TEMPS-A Cyclothymic | 8.96 (2.78) | 6.73 (3.12) | <0.001b,c | <0.001b,c | <0.001b,c |
| TEMPS-A Depressive | 4.78 (2.07) | 4.08 (2.26) | <0.001b,c | <0.001b,c | 0.085 |
| TEMPS-A Irritable | 2.45 (1.84) | 1.68 (1.63) | <0.001b,c | <0.001b,c | 0.013b,c |
| TEMPS-A Hyperthymic | 3.51 (2.19) | 2.1 (1.95) | 0.001b,c | 0.389 | <0.001b,c |
| TEMPS-A Anxious | 1.31 (1.21) | 1.18 (1.08) | 0.002b,c | 0.001b,c | 0.583 |
| Notes: Variables are shown as mean (standard deviation); P values were assessed using Kruskal-Wallis test or Mann-Whitney test. BD = bipolar disorder; MDD = major depressive disorder; HC = healthy control; TEMPS-A = the Chinese short version of Temperament Evaluation of Memphis, Pisa and San Diego – Auto questionnaire; a uncorrected P values; b uncorrected P < 0.05; c differences between groups survived Bonferroni correction (P < 0.017). | | | | | |

| **Table S3. The differences of gray matter volume in regions of interest between patients with bipolar disorder and healthy controls** | | | | | |
| --- | --- | --- | --- | --- | --- |
| **ROIs** | **BD (N=90)** | **HC (N=162)** | **Cohen’s d** | **Puncorrected** | **PFDR** |
| Total intracranial volume | 1589266.08 (155685.35) | 1569709.56 (154002.52) | 0.10 |  |  |
| Left caudal middle frontal gyrus | 6628.08 (1077.15) | 6744.61 (1124.9) | -0.11 | 0.112 | 0.164 |
| Left inferior temporal gyrus | 12224.86 (1974.81) | 12321.43 (1798.51) | -0.05 | 0.221 | 0.228 |
| Left lateral orbitofrontal gyrus | 7872.63 (862.3) | 7808.22 (890.25) | 0.07 | 0.679 | 0.435 |
| Left medial orbitofrontal gyrus | 5713.22 (756.97) | 5688.87 (782.8) | 0.03 | 0.404 | 0.314 |
| Left middle temporal gyrus | 12379.83 (1671.47) | 12119.24 (1652.41) | 0.16 | 0.613 | 0.410 |
| Left inferior frontal gyrus | 11341.96 (1449.54) | 11376.49 (1612.16) | -0.02 | 0.092 | 0.147 |
| Left rostral middle frontal gyrus | 16511.38 (2152.69) | 16788.27 (2405.87) | -0.12 | 0.019a | 0.049b |
| Left superior frontal gyrus | 23642.72 (2623.42) | 23997.54 (2843.81) | -0.13 | 0.022a | 0.050 |
| Left superior temporal gyrus | 13182.73 (1559.62) | 13232.31 (1883.53) | -0.03 | 0.212 | 0.224 |
| Left frontal pole | 1004.4 (155.99) | 998.12 (147.48) | 0.04 | 0.476 | 0.350 |
| Left temporal pole | 2326.46 (318.48) | 2488.47 (355.55) | -0.47 | <0.001a | <0.001b |
| Right caudal middle frontal gyrus | 6426.69 (1042.35) | 6502.19 (1032.93) | -0.07 | 0.208 | 0.222 |
| Right inferior temporal gyrus | 11858.97 (1574.15) | 11661.59 (1779.96) | 0.12 | 0.885 | 0.500 |
| Right lateral orbitofrontal gyrus | 7955.92 (868.57) | 7852.88 (1019.51) | 0.11 | 0.952 | 0.519 |
| Right medial orbitofrontal gyrus | 5922.39 (660.02) | 5884.44 (704.34) | 0.06 | 0.683 | 0.436 |
| Right middle temporal gyrus | 13226.62 (1535.98) | 13010.31 (1645.34) | 0.13 | 0.988 | 0.528 |
| Right inferior frontal gyrus | 11798.11 (1595.05) | 11826.75 (1634.71) | -0.02 | 0.280 | 0.251 |
| Right rostral middle frontal gyrus | 16798.68 (2239.95) | 17047.4 (2499.83) | -0.10 | 0.018a | 0.048b |
| Right superior frontal gyrus | 22631.56 (2504.75) | 22619.66 (2626.37) | 0.00 | 0.312 | 0.261 |
| Right superior temporal gyrus | 12419.91 (1254.7) | 12615.46 (1579.51) | -0.13 | 0.008a | 0.037b |
| Right frontal pole | 1155.69 (157.78) | 1185.46 (171.4) | -0.18 | 0.063 | 0.116 |
| Right temporal pole | 2455.77 (304.65) | 2488.23 (314.29) | -0.10 | 0.242 | 0.236 |
| Notes: Gray matter volume in ROIs are shown as mean (standard deviation); ROI = region of interest; BD = bipolar disorder; MDD = major depressive disorder; HC = healthy control; FDR = false discovery rates; a uncorrected P < 0.05; b PFDR < 0.05. | | | | | |

| **Table S4. The differences of gray matter volume in regions of interest between patients with major depressive disorder and healthy controls** | | | | | |
| --- | --- | --- | --- | --- | --- |
| **ROIs** | **MDD (N=189)** | **HC (N=162)** | **Cohen’s d** | **Puncorrected** | **PFDR** |
| Total intracranial volume | 1569709.56 (154002.52) | 1569709.56 (154002.52) | -0.02 |  |  |
| Left caudal middle frontal gyrus | 6767.98 (1122.15) | 6744.61 (1124.9) | 0.02 | 0.481 | 0.193 |
| Left inferior temporal gyrus | 11966.42 (1861.71) | 12321.43 (1798.51) | -0.20 | 0.052 | 0.080 |
| Left lateral orbitofrontal gyrus | 7716.54 (829.92) | 7808.22 (890.25) | -0.11 | 0.340 | 0.176 |
| Left medial orbitofrontal gyrus | 5629.37 (760.91) | 5688.87 (782.8) | -0.08 | 0.278 | 0.166 |
| Left middle temporal gyrus | 12003.73 (1767.81) | 12119.24 (1652.41) | -0.07 | 0.502 | 0.194 |
| Left inferior frontal gyrus | 11364.77 (1404.74) | 11376.49 (1612.16) | 0.00 | 0.918 | 0.298 |
| Left rostral middle frontal gyrus | 16371.39 (2254.37) | 16788.27 (2405.87) | -0.18 | 0.035a | 0.066 |
| Left superior frontal gyrus | 23554.99 (2920.69) | 23997.54 (2843.81) | -0.16 | 0.111 | 0.113 |
| Left superior temporal gyrus | 13077.36 (1503.25) | 13232.31 (1883.53) | -0.08 | 0.358 | 0.179 |
| Left frontal pole | 991.97 (149.39) | 998.12 (147.48) | -0.04 | 0.973 | 0.311 |
| Left temporal pole | 2362.32 (341.15) | 2488.47 (355.55) | -0.37 | <0.001a | 0.002b |
| Right caudal middle frontal gyrus | 6417.63 (1048.44) | 6502.19 (1032.93) | -0.08 | 0.409 | 0.185 |
| Right inferior temporal gyrus | 11469.29 (1757.89) | 11661.59 (1779.96) | -0.11 | 0.228 | 0.154 |
| Right lateral orbitofrontal gyrus | 7839.7 (933.16) | 7852.88 (1019.51) | -0.01 | 0.902 | 0.295 |
| Right medial orbitofrontal gyrus | 5812.89 (710.16) | 5884.44 (704.34) | -0.10 | 0.395 | 0.184 |
| Right middle temporal gyrus | 12923.27 (1712.46) | 13010.31 (1645.34) | -0.05 | 0.440 | 0.189 |
| Right inferior frontal gyrus | 11650.65 (1647.36) | 11826.75 (1634.71) | -0.09 | 0.544 | 0.201 |
| Right rostral middle frontal gyrus | 16636.87 (2425.08) | 17047.4 (2499.83) | -0.17 | 0.061 | 0.085 |
| Right superior frontal gyrus | 22370.93 (2805.1) | 22619.66 (2626.37) | -0.09 | 0.454 | 0.190 |
| Right superior temporal gyrus | 12413.88 (1332.03) | 12615.46 (1579.51) | -0.13 | 0.114 | 0.114 |
| Right frontal pole | 1154.99 (172.21) | 1185.46 (171.4) | -0.18 | 0.146 | 0.127 |
| Right temporal pole | 2406.34 (320.62) | 2488.23 (314.29) | -0.27 | 0.003a | 0.009b |
| Notes: Gray matter volume in ROIs are shown as mean (standard deviation); ROI = region of interest; BD = bipolar disorder; MDD = major depressive disorder; HC = healthy control; FDR = false discovery rates; a uncorrected P < 0.05; b PFDR < 0.05. | | | | | |

| **Table S5. The differences of gray matter volume in regions of interest between patients with bipolar subtype disorders and patients with major depressive disorder and healthy controls** | | | | | | | | | |
| --- | --- | --- | --- | --- | --- | --- | --- | --- | --- |
| **ROIs** | **BD-I (N=31)** | **BD-II (N=59)** | **Cohen’s d** | **Cohen’s d** | **PBD-I vs HCa** | **PBD-II vs HCa** | **PBD-I vsBD-IIa** | **PBD-I vs MDDa** | **PBD-II vs MDDa** |
| Left caudal middle frontal gyrus | 6431.65 (1118.76) | 6731.29 (1049.54) | -0.28 | -0.01 | 0.064 | 0.378 | 0.284 | 0.025b | 0.161 |
| Left inferior temporal gyrus | 11452.90 (2021.39) | 12630.46 (1839.83) | -0.47 | 0.17 | 0.005b,c | 0.712 | 0.006b | 0.072 | 0.074 |
| Left lateral orbitofrontal gyrus | 7727.39 (766.65) | 7948.95 (905.42) | -0.09 | 0.16 | 0.425 | 0.963 | 0.457 | 0.767 | 0.462 |
| Left medial orbitofrontal gyrus | 5495.23 (769.14) | 5827.76 (731.11) | -0.25 | 0.18 | 0.065 | 0.875 | 0.080 | 0.201 | 0.346 |
| Left middle temporal gyrus | 12155.32 (2079.92) | 12497.8 (1417.16) | 0.02 | 0.24 | 0.926 | 0.511 | 0.724 | 0.652 | 0.251 |
| Left inferior frontal gyrus | 11302.32 (1057.39) | 11368.76 (1615.63) | -0.05 | 0.00 | 0.240 | 0.145 | 0.933 | 0.216 | 0.122 |
| Left rostral middle frontal gyrus | 16007.10 (1807.05) | 16776.34 (2283.55) | -0.34 | -0.01 | 0.011b,c | 0.186 | 0.162 | 0.151 | 0.852 |
| Left superior frontal gyrus | 23254.87 (2752.43) | 23846.51 (2553.35) | -0.26 | -0.05 | 0.116 | 0.068 | 0.844 | 0.462 | 0.486 |
| Left superior temporal gyrus | 13405.45 (1369.28) | 13065.71 (1649.93) | 0.10 | -0.09 | 0.742 | 0.050 | 0.111 | 0.411 | 0.187 |
| Left frontal pole | 984.61 (180.32) | 1014.8 (142.12) | -0.09 | 0.11 | 0.410 | 0.852 | 0.540 | 0.418 | 0.870 |
| Left temporal pole | 2320.87 (331.31) | 2329.39 (314.4) | -0.48 | -0.46 | 0.003b,c | 0.000b,c | 0.875 | 0.314 | 0.109 |
| Right caudal middle frontal gyrus | 6245.45 (1065.83) | 6521.92 (1026.08) | -0.25 | 0.02 | 0.074 | 0.622 | 0.204 | 0.174 | 0.923 |
| Right inferior temporal gyrus | 11690.19 (1285.46) | 11947.64 (1710.1) | 0.02 | 0.16 | 0.817 | 0.807 | 0.712 | 0.683 | 0.264 |
| Right lateral orbitofrontal gyrus | 7849.23 (818.62) | 8011.98 (895.39) | 0.00 | 0.16 | 0.993 | 0.956 | 0.977 | 0.956 | 0.974 |
| Right medial orbitofrontal gyrus | 5838.97 (634.24) | 5966.22 (674.32) | -0.07 | 0.12 | 0.584 | 0.878 | 0.698 | 0.921 | 0.647 |
| Right middle temporal gyrus | 13070.00 (1685.29) | 13308.92 (1459.84) | 0.04 | 0.19 | 0.758 | 0.881 | 0.709 | 0.920 | 0.480 |
| Right inferior frontal gyrus | 11819.74 (1419.11) | 11782.44 (1679.02) | 0.00 | -0.03 | 0.841 | 0.196 | 0.498 | 0.904 | 0.384 |
| Right rostral middle frontal gyrus | 16323.39 (2204.49) | 17048.41 (2236.33) | -0.29 | 0.00 | 0.009b,c | 0.161 | 0.158 | 0.102 | 0.949 |
| Right superior frontal gyrus | 22234.87 (2450.81) | 22839.98 (2528.22) | -0.15 | 0.08 | 0.239 | 0.582 | 0.492 | 0.431 | 0.985 |
| Right superior temporal gyrus | 12273.32 (1276.18) | 12496.93 (1247.3) | -0.22 | -0.08 | 0.044b | 0.032b | 0.709 | 0.235 | 0.298 |
| Right frontal pole | 1147.00 (154.64) | 1160.25 (160.53) | -0.23 | -0.15 | 0.418 | 0.093 | 0.696 | 0.968 | 0.516 |
| Right temporal pole | 2468.77 (298.33) | 2448.93 (310.24) | -0.06 | -0.13 | 0.645 | 0.121 | 0.150 | 0.038b | 0.537 |
| Notes: Gray matter volume in ROIs are shown as mean (standard deviation); ROI = region of interest; BD = bipolar disorder; MDD = major depressive disorder; HC = healthy control; a uncorrected P values; b uncorrected P < 0.05; c differences between groups survived FDR correction (PFDR < 0.05). | | | | | | | | | |

| **Table S6. The differences of gray matter volume in regions of interest between never medicated patients with bipolar disorders and major depressive disorder and healthy controls** | | | | | | | |
| --- | --- | --- | --- | --- | --- | --- | --- |
| **ROIs** | **Never medicated BD (N=52)** | **Never medicated MDD (N=114)** | **Cohen’s d** | **Cohen’s d** | **PBD vs HCa** | **PMDD vs HCa** | **PBD vs MDDa** |
| Left caudal middle frontal gyrus | 6626.31 (961.24) | 6663.26 (1130.41) | -0.11 | -0.07 | 0.518 | 0.918 | 0.497 |
| Left inferior temporal gyrus | 12039.19 (1890.69) | 11716.61 (1900.17) | -0.15 | -0.33 | 0.250 | 0.048b | 0.719 |
| Left lateral orbitofrontal gyrus | 7854.75 (840.91) | 7596.4 (765.11) | 0.05 | -0.25 | 0.838 | 0.089 | 0.155 |
| Left medial orbitofrontal gyrus | 5721.71 (734.21) | 5542.35 (710.83) | 0.04 | -0.19 | 0.819 | 0.220 | 0.271 |
| Left middle temporal gyrus | 12347.19 (1538.24) | 11818.31 (1728.29) | 0.14 | -0.18 | 0.440 | 0.556 | 0.251 |
| Left inferior frontal gyrus | 11336.44 (1597) | 11253.88 (1406.77) | -0.02 | -0.08 | 0.359 | 0.992 | 0.386 |
| Left rostral middle frontal gyrus | 16220.65 (2069.77) | 16167.91 (1967.89) | -0.24 | -0.28 | 0.014b | 0.046b | 0.393 |
| Left superior frontal gyrus | 23355.88 (2539.85) | 23328.89 (2855.59) | -0.23 | -0.23 | 0.054 | 0.170 | 0.418 |
| Left superior temporal gyrus | 13055.87 (1590.34) | 12963.67 (1405.75) | -0.10 | -0.16 | 0.425 | 0.420 | 0.871 |
| Left frontal pole | 1011.27 (132.84) | 986.33 (148.74) | 0.09 | -0.08 | 0.972 | 0.887 | 0.944 |
| Left temporal pole | 2318.33 (280.37) | 2320.82 (326.39) | -0.50 | -0.49 | <0.001b,c | <0.001b,c | 0.735 |
| Right caudal middle frontal gyrus | 6420.21 (959.3) | 6327.83 (993.35) | -0.08 | -0.17 | 0.253 | 0.278 | 0.776 |
| Right inferior temporal gyrus | 11547 (1652.64) | 11204.23 (1609.55) | -0.07 | -0.27 | 0.740 | 0.049b | 0.264 |
| Right lateral orbitofrontal gyrus | 7962.23 (851.1) | 7716.12 (892.55) | 0.11 | -0.14 | 0.649 | 0.697 | 0.479 |
| Right medial orbitofrontal gyrus | 5932.71 (667.24) | 5754.91 (669.6) | 0.07 | -0.19 | 0.703 | 0.392 | 0.329 |
| Right middle temporal gyrus | 13192.12 (1359.99) | 12815.38 (1613.18) | 0.11 | -0.12 | 0.860 | 0.634 | 0.610 |
| Right inferior frontal gyrus | 11545.79 (1730.49) | 11470.15 (1465.14) | -0.17 | -0.23 | 0.116 | 0.173 | 0.627 |
| Right rostral middle frontal gyrus | 16639.79 (2144.86) | 16523.1 (2152.32) | -0.17 | -0.22 | 0.037b | 0.127 | 0.395 |
| Right superior frontal gyrus | 22347.77 (2300.3) | 22069.48 (2608.29) | -0.11 | -0.21 | 0.242 | 0.474 | 0.563 |
| Right superior temporal gyrus | 12251.27 (1225.2) | 12333.57 (1331.23) | -0.24 | -0.19 | 0.012b | 0.214 | 0.143 |
| Right frontal pole | 1143 (152.47) | 1157.91 (171.09) | -0.25 | -0.16 | 0.124 | 0.321 | 0.470 |
| Right temporal pole | 2428.29 (302.27) | 2357.04 (281.6) | -0.19 | -0.44 | 0.426 | <0.001b,c | 0.033b |
| Notes: Gray matter volume in ROIs are shown as mean (standard deviation); ROI = region of interest; BD = bipolar disorder; MDD = major depressive disorder; HC = healthy control; a uncorrected P values; b uncorrected P < 0.05; c differences between groups survived FDR correction (PFDR < 0.05). | | | | | | | |

| **Table S7. Results of Multiple Linear Regression analysis (Forward Stepwise).** | | | | | | |
| --- | --- | --- | --- | --- | --- | --- |
| **Variables** | **Left temporal pole**  **Adjusted R2 = 0.050** | | | **Right temporal pole**  **Adjusted R2 = 0.094** | | | |
| **Standardized Beta** | **t** | **Pa** | **Standardized Beta** | **t** | **Pa** | |
| TIV | 0.236 | 3.114 | 0.002b,c | 0.315 | 4.257 | <0.001b,c | |
| Sex | -0.010 | -0.103 | 0.918 | 0.047 | 0.501 | 0.617 | |
| Education years | -0.033 | -0.437 | 0.663 | -0.017 | -0.230 | 0.818 | |
| Age of onset | -0.046 | -0.610 | 0.542 | -0.039 | -0.530 | 0.597 | |
| Number of mood episodes | -0.042 | -0.547 | 0.585 | -0.061 | -0.815 | 0.416 | |
| Illness duration | 0.004 | 0.053 | 0.958 | -0.125 | -1.697 | 0.092 | |
| HAMA total score | -0.040 | -0.524 | 0.601 | -0.042 | -0.570 | 0.569 | |
| HAMD total score | -0.070 | -0.918 | 0.360 | -0.108 | -1.469 | 0.144 | |
| YMRS total score | 0.028 | 0.371 | 0.711 | 0.020 | 0.272 | 0.786 | |
| TEMPS-A Cyclothymic | 0.003 | 0.038 | 0.970 | 0.082 | 1.104 | 0.271 | |
| TEMPS-A Depressive | -0.071 | -0.937 | 0.350 | 0.062 | 0.829 | 0.408 | |
| TEMPS-A Irritable | -0.081 | -1.061 | 0.290 | -0.008 | -0.108 | 0.914 | |
| TEMPS-A Hyperthymic | -0.101 | -1.322 | 0.188 | -0.101 | -1.344 | 0.181 | |
| TEMPS-A Anxious | -0.126 | -1.676 | 0.096 | -0.022 | -0.296 | 0.767 | |
| History of treatment with psychotropics | 0.104 | 1.351 | 0.179 | 0.127 | 1.707 | 0.090 | |
| Notes: TIV = total intracranial volume; HAMA = Hamilton Anxiety Rating Scale; HAMD = Hamilton Depression Rating Scale-17 items; YMRS = Young Mania Rating Scale; TEMPS-A = The Chinese short version of Temperament Evaluation of Memphis, Pisa and San Diego - Auto questionnaire; a uncorrected P values; b uncorrected P < 0.05; c survived FDR correction (PFDR < 0.05). | | | | | | | |
